# Supplementary material for: Decreased Fatty Acid Transporter FABP1 and Increased Isoprostanes and Neuroprostanes in the Human Term Placenta: Implications for Inflammation and Birth Weight in Maternal Pre-Gestational Obesity
Source: Preprints.org preprint supplement (doi:10.20944/preprints202107.0526.v1), 2021-07-23
Supplement: Supplementary file 4 [file Supplementary_Table1_Belcastro_etal.docx]

Supplementary Table 1:

Internal standards used in the Ion Mobility QTOF LC/MS lipid profileanalysis

| Name | trivial name | class | store |
| --- | --- | --- | --- |
| N-palmitoyl-d31-D-erythro-sphingosine (C16-d31 Ceramide) | C16-d31 Ceramide | Cer | avanti |
| 1-palmitoyl-d31-2-oleoyl-sn-glycero-3-phosphate (sodium salt) (16:0-d31-18:1 PA) | 16:0-d31-18:1 PA | PA | avanti |
| 1-palmitoyl(D31)-2-oleyl-sn-glycero-3-phosphocholine (16:0-d31-18:1 PC) | 16:0-d31-18:1 PC | PC | avanti |
| 1-palmitoyl(D31)-2-oleyl-sn-glycero-3-phosphoethanolamine (16:0-d31-18:1 PE) | 16:0-d31-18:1 PE | PE | avanti |
| 1-palmitoyl-d31-2-oleoyl-sn-glycero-3-[phospho-rac-(1-glycerol)] (sodium salt) (16:0-d31-18:1 PG) | 16:0-d31-18:1 PG | PG | avanti |
| 1-palmitoyl-d31-2-oleoyl-sn-glycero-3-phosphoinositol (ammonium salt) (16:0-d31-18:1 PI) | 16:0-d31-18:1 PI | PI | avanti |
| 1,2-dimyristoyl-d54-sn-glycero-3[phospho-L-serine] (sodium salt)(14:0 PS-d54) | 14:0 PS-d54 | PS | avanti |
| N-palmitoyl(D31)-d-erythro-sphingosylphosphorylcholine (16:0-d31 SM) | 16:0-d31 SM | SM | avanti |
| 1,2-dipalmitoyl-d62-sn-glycero-3-[phospho-L-serine] (sodium salt) | 16:0 PS-d62 | PS | avanti |
| cholesteryl-2,2,3,4,4,6-d6-octadecanoate (18:0-d6 CE) | 18:0-d6 CE | Cer | qmx |
| Pentadecanoic-d29 Acid (15:0-d29 FA) | 15:0-d29 FA | FA | qmx |
| Heptadecanoic-d33-acid (17:0-d33 FA) | 17:0-d33 FA | FA | qmx |
| Eicosanoic-d39 Acid (20:0-d39 FA) | 20:0-d39 FA | FA | qmx |
| Tetradecylphosphocholine-d42 (14:0-d29 LPC-d13) | 14:0-d29 LPC-d13 | LysoPC | qmx |
| Glyceryl Tri(pentadecanoate-d29) (45:0-d29 TG) | 45:0-d29 TG | TAG | qmx |
| glyceryl-tri(hexadecanoate-d31) (48:0-d31 TG) | 48:0-d31 TG | TAG | qmx |
| Glyceryl Tri(octadecanoate-d35) (54:0-d35 TG) | 54:0-d35 TG | TAG | qmx |
| arachidonic acid d8 | arachidonic acid d8 | PUFA | Cayman Chemicals |
| linoleic acid d4 | linoleic acid d4 | PUFA | Cayman Chemicals |
| 11(12)-EET-d11 | 11(12)-EET-d11 | oxFAa | Cayman Chemicals |
| Prostaglandin E2-d4 | Prostaglandin E2-d4 | oxFAa | Cayman Chemicals |
| 12-HETE-d8 | 12-HETE-d8 | oxFAa | Cayman Chemicals |
| TxB2-d4 | TxB2-d4 | oxFAa | Cayman Chemicals |
| LTB2-d4 | LTB2-d4 | oxFAa | Cayman Chemicals |

aoxFA = oxidised fatty acid
